# Supplementary material
Source: publisher figshare collection journal article supplement (https://sage.figshare.com/ndownloader/files/22055745)
Supplement: Supplementary file 1 [file 22055745]

**Table S2: Search strategies**

|                                                                                       |                                                                                                                                                                                                           |
|---------------------------------------------------------------------------------------|-----------------------------------------------------------------------------------------------------------------------------------------------------------------------------------------------------------|
| <b>Search strategy for CENTRAL, The Cochrane Library (271)</b>                        |                                                                                                                                                                                                           |
| #1                                                                                    | MeSH descriptor: [Venous Thromboembolism] explode all trees                                                                                                                                               |
| #2                                                                                    | MeSH descriptor: [Deep-Venous Thromboses] explode all trees                                                                                                                                               |
| #3                                                                                    | MeSH descriptor: [pulmonary embolism] explode all trees                                                                                                                                                   |
| #4                                                                                    | MeSH descriptor: [Thrombosis] explode all trees                                                                                                                                                           |
| #5                                                                                    | MeSH descriptor: [Thromboembolism ] explode all trees                                                                                                                                                     |
| #6                                                                                    | "deep vein thrombosis" or "Venous thrombosis" or "Thrombophlebitis":ti,ab,kw                                                                                                                              |
| #7                                                                                    | #1 or #2 or #3 or #4 or #5 or #6                                                                                                                                                                          |
| #8                                                                                    | MeSH descriptor: [Neoplasms] explode all trees                                                                                                                                                            |
| #9                                                                                    | MeSH descriptor: [Carcinoma] explode all trees                                                                                                                                                            |
| #10                                                                                   | "tumor" or "tumour" or "malign*" or "cancer" or neoplas*" or "adenocarcinoma":ti,ab,kw                                                                                                                    |
| #11                                                                                   | #8 or #9 or #10                                                                                                                                                                                           |
| #12                                                                                   | "Prophylaxis" or "Prevent" or "Prevention" or "Precaution" :ti,ab,kw                                                                                                                                      |
| #13                                                                                   | MeSH descriptor: [Randomized Controlled Trials as Topic] explode all trees                                                                                                                                |
| #14                                                                                   | ((randomized controlled trial or controlled clinical trial) .pt. or randomized.ab. or placebo.ab. or clinical trials as topic.sh. or randomly.ab. or trial.ti.) not (animals not (humans and animals))    |
| #15                                                                                   | #13 or #14                                                                                                                                                                                                |
| #16                                                                                   | #7 and #11 and #12 and #15                                                                                                                                                                                |
| <a href="https://www.cochranelibrary.com/cca">https://www.cochranelibrary.com/cca</a> |                                                                                                                                                                                                           |
| <b>Search strategy for EMBASE (6554)</b>                                              |                                                                                                                                                                                                           |
| 1.                                                                                    | 'Venous Thromboembolism' OR 'deep vein thrombosis' OR 'Thromboembolism' OR 'Venous thrombosis' OR 'Thrombophlebitis' OR 'Thrombosis' OR 'pulmonary embolism'                                              |
| 2.                                                                                    | 'tumor' OR 'tumour' OR 'malign*' OR 'carcinoma*' OR 'cancer' or 'neoplas*' or 'adenocarcinoma'                                                                                                            |
| 3.                                                                                    | 'Prophylaxis' or 'Prevent' or 'Prevention' or 'Precaution'                                                                                                                                                |
| 4.                                                                                    | 1 and 2 and 3                                                                                                                                                                                             |
| 5.                                                                                    | 'randomized controlled trial' OR 'controlled clinical trial' OR randomized OR 'placebo' OR 'clinical trial (topic)' OR randomly OR trial OR 'clinical trial' OR ((clinical AND trials AND as AND topic OR |

|                                                                                                                                                                                                                                 |
|---------------------------------------------------------------------------------------------------------------------------------------------------------------------------------------------------------------------------------|
| randomly OR trial) NOT (animals NOT (humans AND animals)))                                                                                                                                                                      |
| 6. 4 and 5                                                                                                                                                                                                                      |
| <a href="https://www.embase.com/#search">https://www.embase.com/#search</a>                                                                                                                                                     |
| <b>Search strategy for MEDLINE (4327)</b>                                                                                                                                                                                       |
| 1. ("Prophylaxis" or "Prevent" or "Prevention" or "Precaution").mp. [mp=tx, bt, ti, ab, ct, sh, hw, sa, ot, rx, px, nm, kf]                                                                                                     |
| 2. ("Venous Thromboembolism" or "deep vein thrombosis" or "Thromboembolism" or "Venous thrombosis" or "Thrombophlebitis" or "Thrombosis" or "pulmonary embolism").mp. [mp=tx, bt, ti, ab, ct, sh, hw, sa, ot, rx, px, nm, kf]   |
| 3. ("tumor" or "tumour" or "malign*" or "carcinoma*" or "cancer" or "neoplas*" or "adenocarcinoma").mp. [mp=tx, bt, ti, ab, ct, sh, hw, sa, ot, rx, px, nm, kf]                                                                 |
| 4. ((randomized controlled trial or controlled clinical trial).pt. or randomized.ab. or placebo.ab. or clinical trials as topic.sh. or randomly.ab. or trial.ti.) not (animals not (humans and animals)).sh.                    |
| 5. 1 and 2 and 3 and 4                                                                                                                                                                                                          |
| <a href="http://ovidsp.dc2.ovid.com.liboc.tctc.edu:2048/sp-3.33.0b/ovidweb.cgi">http://ovidsp.dc2.ovid.com.liboc.tctc.edu:2048/sp-3.33.0b/ovidweb.cgi</a>                                                                       |
| <b>Search strategy for CINAHL (EBSCOhost) (286)</b>                                                                                                                                                                             |
| S1 "Prophylaxis" or "Prevent" or "Prevention" or "Precaution"                                                                                                                                                                   |
| S2 "Venous Thromboembolism" or "deep vein thrombosis" or "Thromboembolism" or "Venous thrombosis" or "Thrombophlebitis" or "Thrombosis" or "pulmonary embolism"                                                                 |
| S3 "tumor" or "tumour" or "malign*" or "carcinoma*" or "cancer" or "neoplas*" or "adenocarcinoma"                                                                                                                               |
| S4 (MH "Randomized Controlled Trial as Topic") OR ((randomized controlled trial or controlled clinical trial) or randomized or placebo or clinical trials as topic or randomly or trial) not (animals not (humans and animals)) |
| S5 S1 AND S2 AND S3 AND S4                                                                                                                                                                                                      |
| <a href="http://search.ebscohost.com">http://search.ebscohost.com</a>                                                                                                                                                           |
| <b>Search strategy for ISIWeb of Science (1645)</b>                                                                                                                                                                             |
| #1 TS=(Prophylaxis or Prevent or Prevention or Precaution)                                                                                                                                                                      |
| #2 TS=(Venous Thromboembolism or deep vein thrombosis or Thromboembolism or Venous thrombosis or Thrombophlebitis or Thrombosis or pulmonary embolism)                                                                          |
| #3 TS=(tumor or tumour or malign* or carcinoma* or cancer or neoplas* or adenocarcinoma)                                                                                                                                        |

#4 TS=((randomized controlled trial or controlled clinical trial or randomized or placebo or clinical trials as topic or randomly or trial) not (animals not (humans and animals)))

#5 #1 and #2 and #3 and #4

<https://login.emedien.ub.uni-muenchen.de/login?url=http://www.webofknowledge.com/wos>
